# Supplementary material for: 3a-(4-Chlorophenyl)-1-thioxo-2,3,3a,4-tetrahydroimidazo[1,5-a]quinazolin-5(1H)-one
Source: Preprints.org preprint supplement (doi:10.20944/preprints202406.1562.v1), 2024-06-24
Supplement: Supplementary file 1 [file supplementary]

## Supplementary Material

### 3a-(4-Chlorophenyl)-1-thioxo-2,3,3a,4-tetrahydroimidazo[1,5-*a*]quinazolin-5(1H)-one

#### Contents

**Figure S1.** Analytical HPLC chromatogram of title compound (RP18, CH<sub>3</sub>CN/ H<sub>2</sub>O 1:1, *t<sub>R</sub>* 5.99 min).

**Figure S2.** <sup>1</sup>HNMR (400MHz) and <sup>13</sup>CNMR (100 MHz) spectra of title compound in CDCl<sub>3</sub> /CD<sub>3</sub>OD.

**Figure S3.** Correlation plot of calculated vs. experimental <sup>13</sup>CNMR chemical shifts for the model compounds (acetone, acetamide, thioacetamide, imidazolin-2-one, thiourea, phenylthiourea, cyanothioacetamide, ethyl dithioacetate, and N,N'-diethylthiobarbituric acid) in the validation of the adopted BP86 /Jgauss-TZP2 level of theory.

**Table S1.** <sup>13</sup>CNMR chemical shifts (ppm) of title compound: experimental and BP86 /Jgauss-TZP2 calculated values for the thioamide (NHC=S) and iminethiol (N=CSH) tautomers.

**Table S2.** xyz Coordinates of geometry-optimized structures of title compounds and its tautomer.

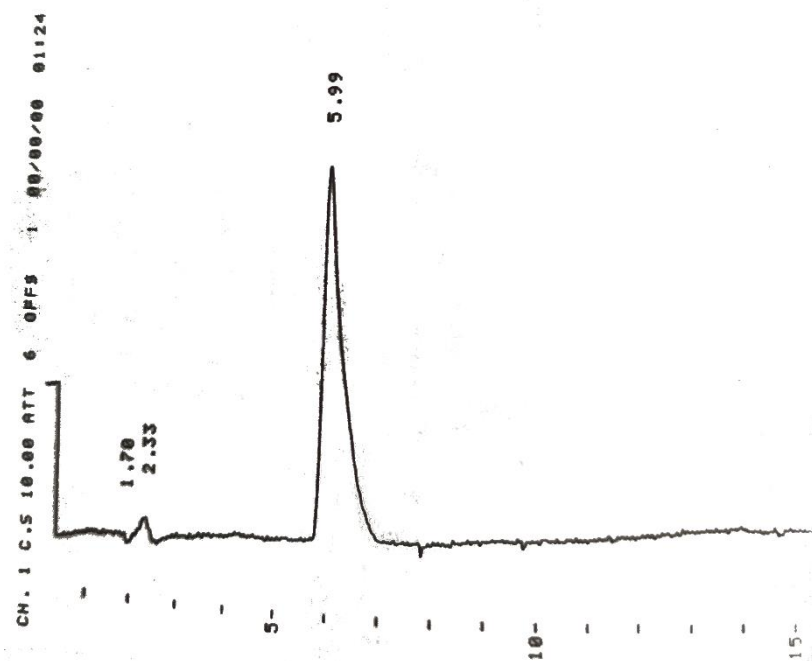

**Figure S1.** Analytical HPLC chromatogram of tile compound (RP18, CH<sub>3</sub>CN/ H<sub>2</sub>O 1:1, *t<sub>R</sub>* 5.99 min).

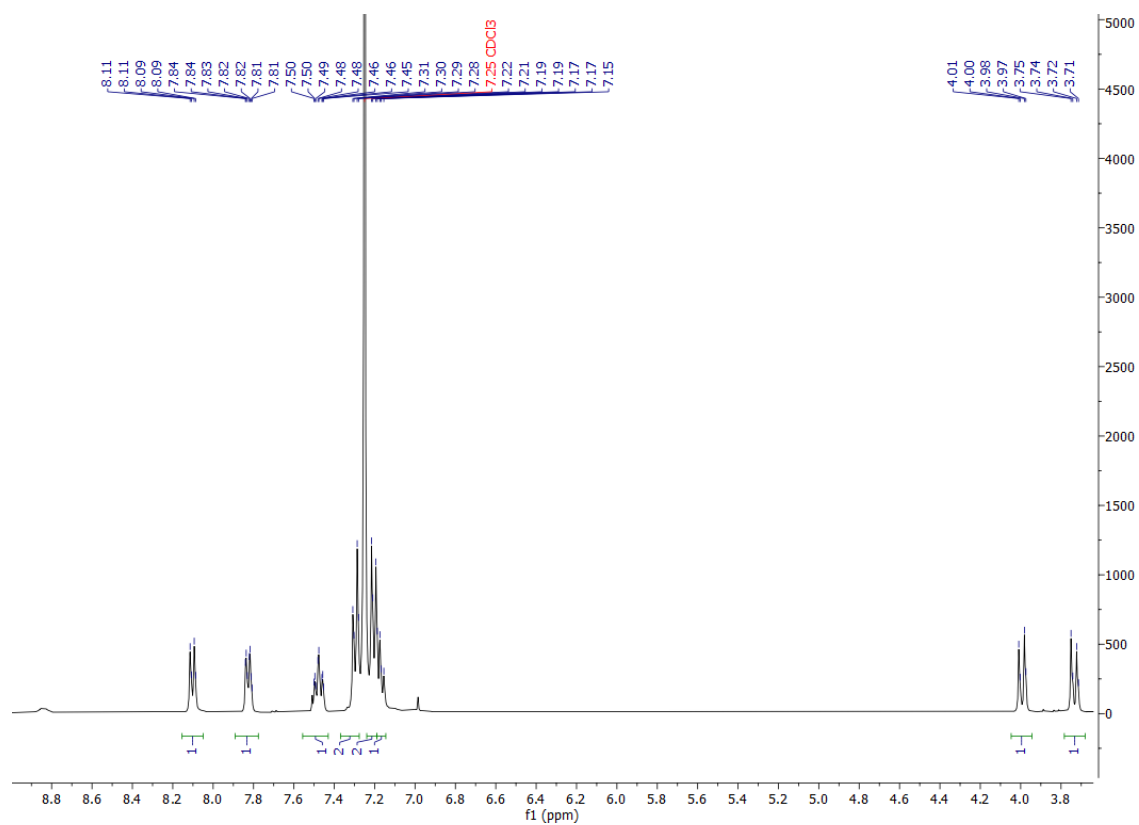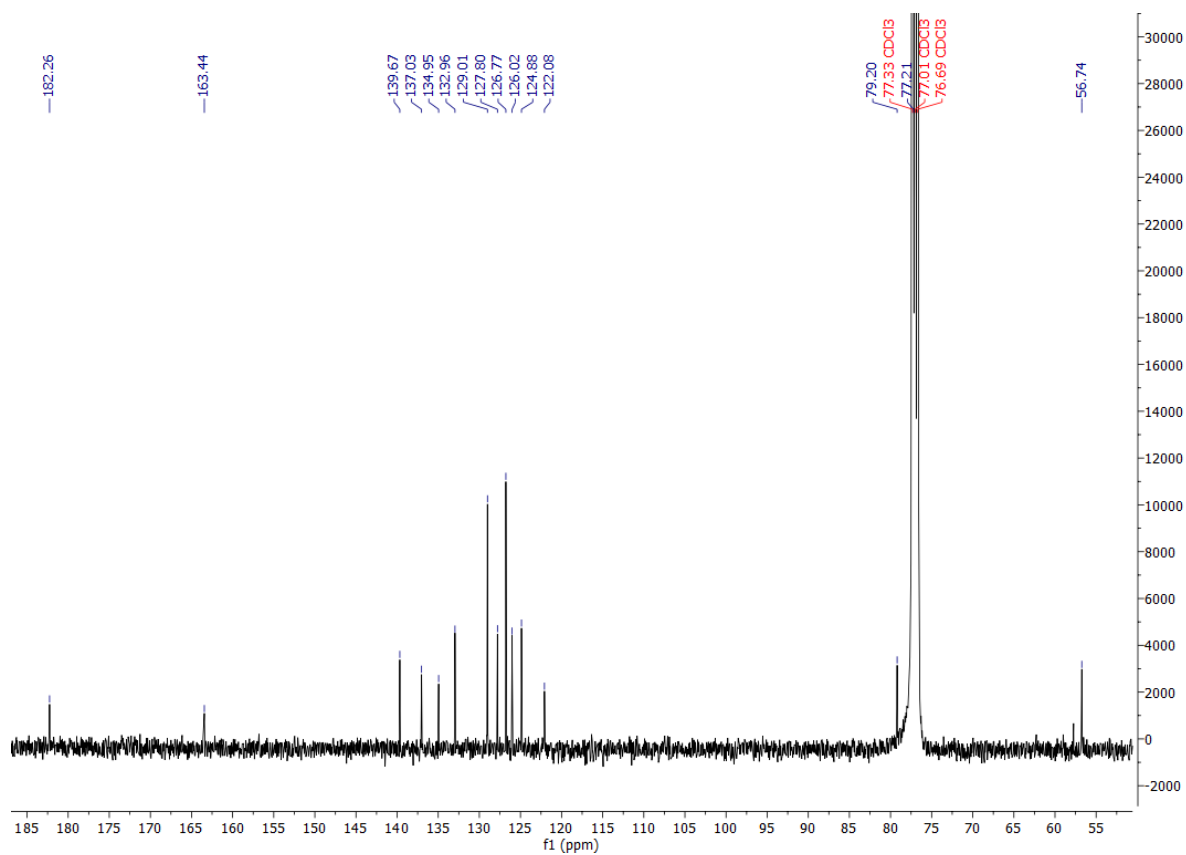

**Figure S2.** <sup>1</sup>H NMR (400 MHz) and <sup>13</sup>C NMR (100 MHz) spectra of title compound in CDCl<sub>3</sub>/CD<sub>3</sub>OD.

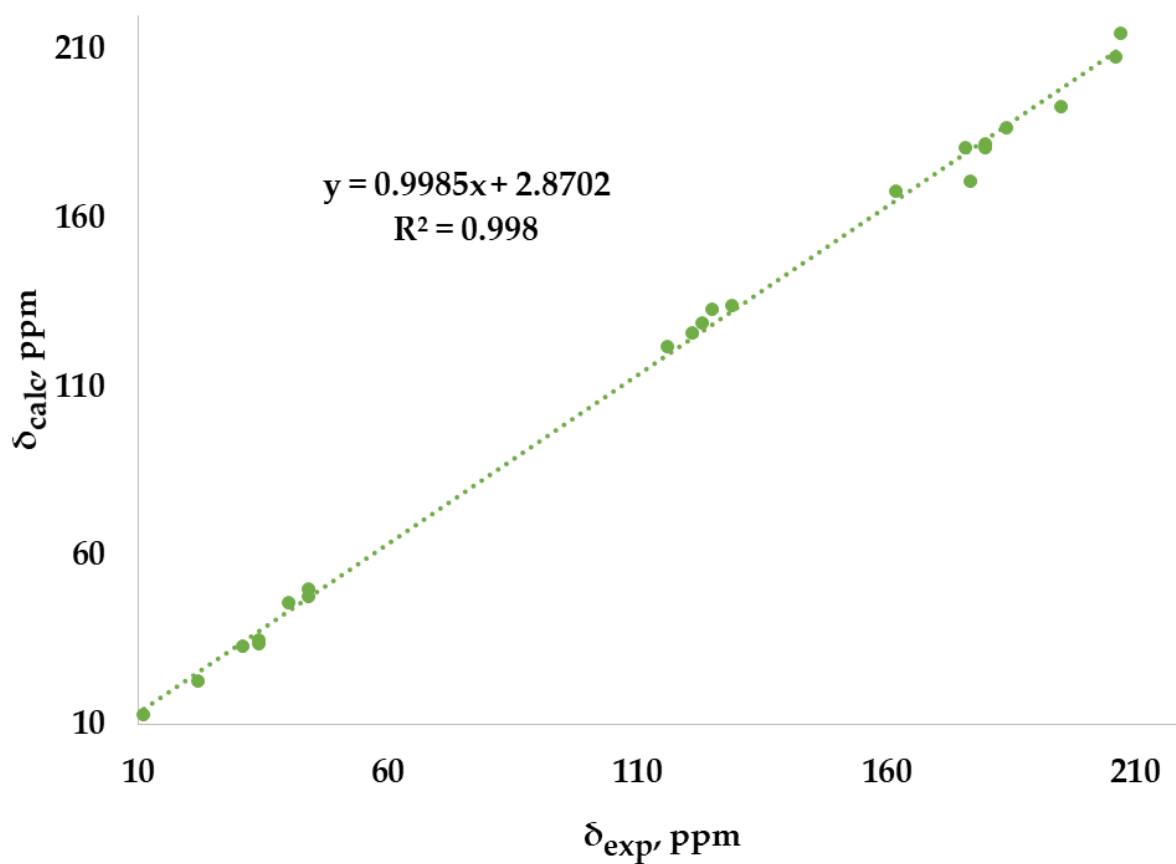

**Figure S3.** Correlation plot of calculated vs. experimental  $^{13}\text{C}$ NMR chemical shifts for the model compounds (acetone, acetamide, thioacetamide, imidazolin-2-one, thiourea, phenylthiourea, cyanothioacetamide, ethyl dithioacetate, and N,N'-diethylthiobarbituric acid) in the validation of the adopted BP86 /Jgauss-TZP2 level of theory.

**Table S1.**  $^{13}\text{C}$ NMR chemical shifts (ppm) of title compound: experimental and BP86 /Jgauss-TZP2 calculated values for the thioamide ( $\text{NHC}=\text{S}$ ) and iminethiol ( $\text{N}=\text{CSH}$ ) tautomers.

| <div style="display: flex; justify-content: space-around; align-items: center;"> 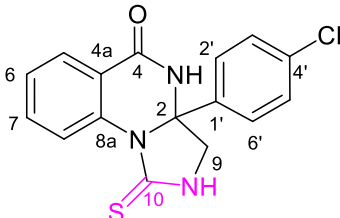  </div> |              |            |            |
|----------------------------------------------------------------------------------------------------------------------------------------------------------------------------------------------------------------------------------------------------------------|--------------|------------|------------|
| Assignment                                                                                                                                                                                                                                                     | Experimental | Calculated | Calculated |
| C(2)                                                                                                                                                                                                                                                           | 79.20        | 85.74      | 89.23      |
| C(4)                                                                                                                                                                                                                                                           | 163.44       | 164.30     | 163.10     |
| C(4a)                                                                                                                                                                                                                                                          | 124.88       | 124.41     | 129.05     |
| C(5)                                                                                                                                                                                                                                                           | 127.80       | 131.54     | 132.34     |
| C(6)                                                                                                                                                                                                                                                           | 126.02       | 127.97     | 130.46     |
| C(7)                                                                                                                                                                                                                                                           | 132.96       | 136.41     | 137.16     |
| C(8)                                                                                                                                                                                                                                                           | 122.08       | 124.49     | 129.47     |
| C(8a)                                                                                                                                                                                                                                                          | 134.95       | 141.20     | 142.17     |
| C(9)                                                                                                                                                                                                                                                           | 56.74        | 61.74      | 78.29      |
| C(10)                                                                                                                                                                                                                                                          | 182.26       | 181.84     | 162.72     |
| C(1')                                                                                                                                                                                                                                                          | 139.67       | 147.30     | 147.31     |
| C(2')                                                                                                                                                                                                                                                          | 126.77       | 129.90     | 132.39     |
| C(3')                                                                                                                                                                                                                                                          | 129.01       | 131.62     | 131.30     |
| C(4')                                                                                                                                                                                                                                                          | 137.03       | 147.34     | 146.54     |
| C(5')                                                                                                                                                                                                                                                          | 129.01       | 133.51     | 132.06     |
| C(6')                                                                                                                                                                                                                                                          | 126.77       | 130.36     | 132.21     |

**Table S2.** xyz Coordinates of geometry-optimized structures of title compounds and its tautomer.

| 34                           |          |          |          | 34                  |          |          |          |
|------------------------------|----------|----------|----------|---------------------|----------|----------|----------|
| Compound (as thioamide form) |          |          |          | Iminethiol tautomer |          |          |          |
| O                            | -1.22612 | 2.67275  | 2.34424  | O                   | -1.27079 | 1.79753  | 2.86903  |
| C                            | -1.16228 | 1.69145  | 1.63573  | C                   | -1.11845 | 1.08964  | 1.89603  |
| C                            | -1.53748 | 1.68083  | 0.20370  | C                   | -1.39255 | 1.54649  | 0.50870  |
| C                            | -1.83108 | 2.89291  | -0.40813 | C                   | -1.63198 | 2.89258  | 0.26782  |
| H                            | -1.73901 | 3.78962  | 0.18940  | H                   | -1.57780 | 3.57315  | 1.10685  |
| C                            | -2.24047 | 2.92893  | -1.72630 | C                   | -1.94696 | 3.32605  | -1.00741 |
| H                            | -2.46977 | 3.87280  | -2.20145 | H                   | -2.13369 | 4.37470  | -1.19419 |
| C                            | -2.35467 | 1.73989  | -2.43580 | C                   | -2.01481 | 2.40999  | -2.05032 |
| H                            | -2.66657 | 1.75733  | -3.47188 | H                   | -2.24332 | 2.74760  | -3.05266 |
| C                            | -2.06652 | 0.52092  | -1.84643 | C                   | -1.76783 | 1.06492  | -1.82558 |
| H                            | -2.15413 | -0.39711 | -2.40314 | H                   | -1.77594 | 0.35208  | -2.63892 |
| C                            | -1.65898 | 0.48593  | -0.51750 | C                   | -1.46867 | 0.62848  | -0.54016 |
| N                            | -1.31795 | -0.69376 | 0.15559  | N                   | -1.18682 | -0.72533 | -0.26777 |
| C                            | -1.75919 | -1.97703 | -0.01651 | C                   | -2.12519 | -1.77211 | -0.20640 |
| N                            | -1.09041 | -2.73972 | 0.89105  | N                   | -1.80259 | -2.77042 | 0.50365  |
| H                            | -1.43790 | -3.66826 | 1.05468  | C                   | -0.49532 | -2.47835 | 1.05828  |
| C                            | -0.46747 | -1.95306 | 1.92614  | H                   | 0.26937  | -3.06381 | 0.54289  |
| H                            | 0.50291  | -2.35290 | 2.21424  | H                   | -0.45184 | -2.73565 | 2.11737  |
| H                            | -1.10786 | -1.85856 | 2.80839  | S                   | -3.61466 | -1.76860 | -1.13145 |
| S                            | -2.86216 | -2.57500 | -1.09005 | H                   | -3.67320 | -0.43679 | -1.29272 |
| C                            | -0.33723 | -0.58052 | 1.23761  | C                   | -0.25765 | -0.96876 | 0.83267  |
| C                            | 1.05697  | -0.35751 | 0.65608  | C                   | 1.16633  | -0.62910 | 0.42696  |
| C                            | 1.88981  | 0.65274  | 1.11415  | C                   | 2.00273  | 0.12223  | 1.23963  |
| H                            | 1.54875  | 1.33903  | 1.87706  | H                   | 1.63719  | 0.51993  | 2.17613  |
| C                            | 3.16505  | 0.81234  | 0.59087  | C                   | 3.31203  | 0.38572  | 0.86237  |
| H                            | 3.80981  | 1.60446  | 0.94305  | H                   | 3.96055  | 0.97300  | 1.49624  |
| C                            | 3.60332  | -0.04944 | -0.39724 | C                   | 3.78116  | -0.10603 | -0.34110 |
| Cl                           | 5.19699  | 0.14277  | -1.05823 | Cl                  | 5.41735  | 0.22095  | -0.82386 |
| C                            | 2.78525  | -1.06308 | -0.87344 | C                   | 2.96153  | -0.85453 | -1.17295 |
| H                            | 3.14002  | -1.72179 | -1.65290 | H                   | 3.34181  | -1.22495 | -2.11404 |
| C                            | 1.51626  | -1.21034 | -0.34536 | C                   | 1.66100  | -1.11158 | -0.78234 |
| H                            | 0.87473  | -1.99676 | -0.72216 | H                   | 1.01119  | -1.68312 | -1.43274 |
| N                            | -0.76489 | 0.47101  | 2.12188  | N                   | -0.71515 | -0.21243 | 1.98320  |
| H                            | -0.44118 | 0.47065  | 3.07643  | H                   | -0.51883 | -0.55146 | 2.91161  |

.....
